# Supplementary material for: Systematic Exploration of the Synthetic Parameters for the Production of Dynamic VO2(M1)
Source: MDPI journal article supplement (doi:10.3390/molecules26154513), 2021-07-27
Supplement: s1 [file s1]

## Supporting Information

Giulia Braggaglia<sup>1,2</sup>, Andrea Cacciatore<sup>1,3</sup>, Elisa Poffe<sup>1,2</sup>, Claudia Capone<sup>3</sup>, Federico Zorzi<sup>4,5</sup>, Valerio Causin<sup>1</sup>,  
Silvia Gross<sup>\*1,2</sup>

<sup>1</sup> Dipartimento di Scienze Chimiche, Università degli Studi di Padova, via Marzolo 1, 35131 Padova, Italy

<sup>2</sup> INSTM, Consorzio Interuniversitario per la Scienza e Tecnologia dei Materiali, via Giusti 9, 50121, Firenze, Italy

<sup>3</sup> Italcementi S.p.A., HeidelbergCement Group, via Stezzano 87, 24126, Bergamo, Italy

<sup>4</sup> CEASC, Centro di Analisi e Servizi per la Certificazione, via Jappelli 1/A 35131 Padova, Italy

<sup>5</sup> Dipartimento di Geoscienze, Università degli Studi di Padova, via Gradenigo 6, 35131 Padova, Italy

\* Correspondence: [silvia.gross@unipd.it](mailto:silvia.gross@unipd.it)

### Hydrothermal synthesis

Table 1: : Detailed list of the synthesized samples through hydrothermal route.

| Samples     | Reagents                        | Quantities | PM (g/mol) | Density (g/cm <sup>3</sup> ) | moles    | Concentration (M=mol/mL) | Molar ratios | Temperature (°C) | Time (h) |
|-------------|---------------------------------|------------|------------|------------------------------|----------|--------------------------|--------------|------------------|----------|
| V1(1.2)_24h | V <sub>2</sub> O <sub>5</sub>   | 0.1670 g   | 181.88     |                              | 0.000918 | 0.0000918                | 1            | 160              | 24       |
|             | Citric acid                     | 0.2376 g   | 210.14     |                              | 0.001131 | 0.0001131                | 1.2          |                  |          |
|             | Deionized H <sub>2</sub> O      | 10 mL      | 18.00      | 1.000                        | 0.555556 |                          | 605          |                  |          |
| N1(1.2)_24h | NH <sub>4</sub> VO <sub>3</sub> | 0.1666 g   | 181.88     |                              | 0.000916 | 0.0000916                | 1            | 160              | 24       |
|             | Citric acid                     | 0.2368 g   | 210.14     |                              | 0.001127 | 0.0001127                | 1.2          |                  |          |
|             | Deionized H <sub>2</sub> O      | 10 mL      | 18.00      | 1.000                        | 0.555556 |                          | 607          |                  |          |
| V2(1.2)_24h | V <sub>2</sub> O <sub>5</sub>   | 0.1673 g   | 181.88     |                              | 0.000920 | 0.0000920                | 1            | 160              | 24       |
|             | Oxalic Acid                     | 0.0987 g   | 90,034     |                              | 0.001096 | 0.0001096                | 1.2          |                  |          |
|             | Deionized H <sub>2</sub> O      | 10 mL      | 18.00      | 1.000                        | 0.555556 |                          | 604          |                  |          |
| N2(1.2)_24h | NH <sub>4</sub> VO <sub>3</sub> | 0.1064 g   | 181.88     |                              | 0.000585 | 0.0000585                | 1            | 160              | 24       |
|             | Oxalic Acid                     | 0.0635 g   | 90,034     |                              | 0.000705 | 0.0000705                | 1.2          |                  |          |
|             | Deionized H <sub>2</sub> O      | 10 mL      | 18.00      | 1.000                        | 0.555556 |                          | 950          |                  |          |
| V3(1.7)_24h | V <sub>2</sub> O <sub>5</sub>   | 0.1679 g   | 181.88     |                              | 0.000923 | 0.0000923                | 1            | 160              | 24       |
|             | Oxalic Acid                     | 0.1420 g   | 90,034     |                              | 0.001577 | 0.0001577                | 1.7          |                  |          |
|             | Deionized H <sub>2</sub> O      | 10 mL      | 18.00      | 1.000                        | 0.555556 |                          | 602          |                  |          |
| V4(1.7)_24h | V <sub>2</sub> O <sub>5</sub>   | 0.1687 g   | 181.88     |                              | 0.000928 | 0.0000928                | 1            | 180              | 24       |
|             | Oxalic Acid                     | 0.1425 g   | 90,034     |                              | 0.001583 | 0.0001583                | 1.7          |                  |          |
|             | Deionized H <sub>2</sub> O      | 10 mL      | 18.00      | 1.000                        | 0.555556 |                          | 599          |                  |          |
| V5(1.7)_12h | V <sub>2</sub> O <sub>5</sub>   | 0.1672 g   | 181.88     |                              | 0.000919 | 0.0000919                | 1            | 180              | 12       |
|             | Oxalic Acid                     | 0.1416 g   | 90,034     |                              | 0.001573 | 0.0001573                | 1.7          |                  |          |
|             | Deionized H <sub>2</sub> O      | 10 mL      | 18.00      | 1.000                        | 0.555556 |                          | 604          |                  |          |

|                   |                               |          |        |       |          |           |     |     |   |
|-------------------|-------------------------------|----------|--------|-------|----------|-----------|-----|-----|---|
| <b>V6(1.7)_8h</b> | V <sub>2</sub> O <sub>5</sub> | 0.1686 g | 181.88 |       | 0.000927 | 0.0000927 | 1   | 180 | 8 |
|                   | Oxalic Acid                   | 0.1427 g | 90,034 |       | 0.001585 | 0.0001585 | 1.7 |     |   |
|                   | Deionized H <sub>2</sub> O    | 10 mL    | 18.00  | 1.000 | 0.555556 |           | 599 |     |   |
| <b>V7(1.7)_6h</b> | V <sub>2</sub> O <sub>5</sub> | 0.1677 g | 181.88 |       | 0.000922 | 0.0000922 | 1   | 180 | 6 |
|                   | Oxalic Acid                   | 0.1418 g | 90,034 |       | 0.001575 | 0.0001575 | 1.7 |     |   |
|                   | Deionized H <sub>2</sub> O    | 10 mL    | 18.00  | 1.000 | 0.555556 |           | 603 |     |   |

## XRD analyses

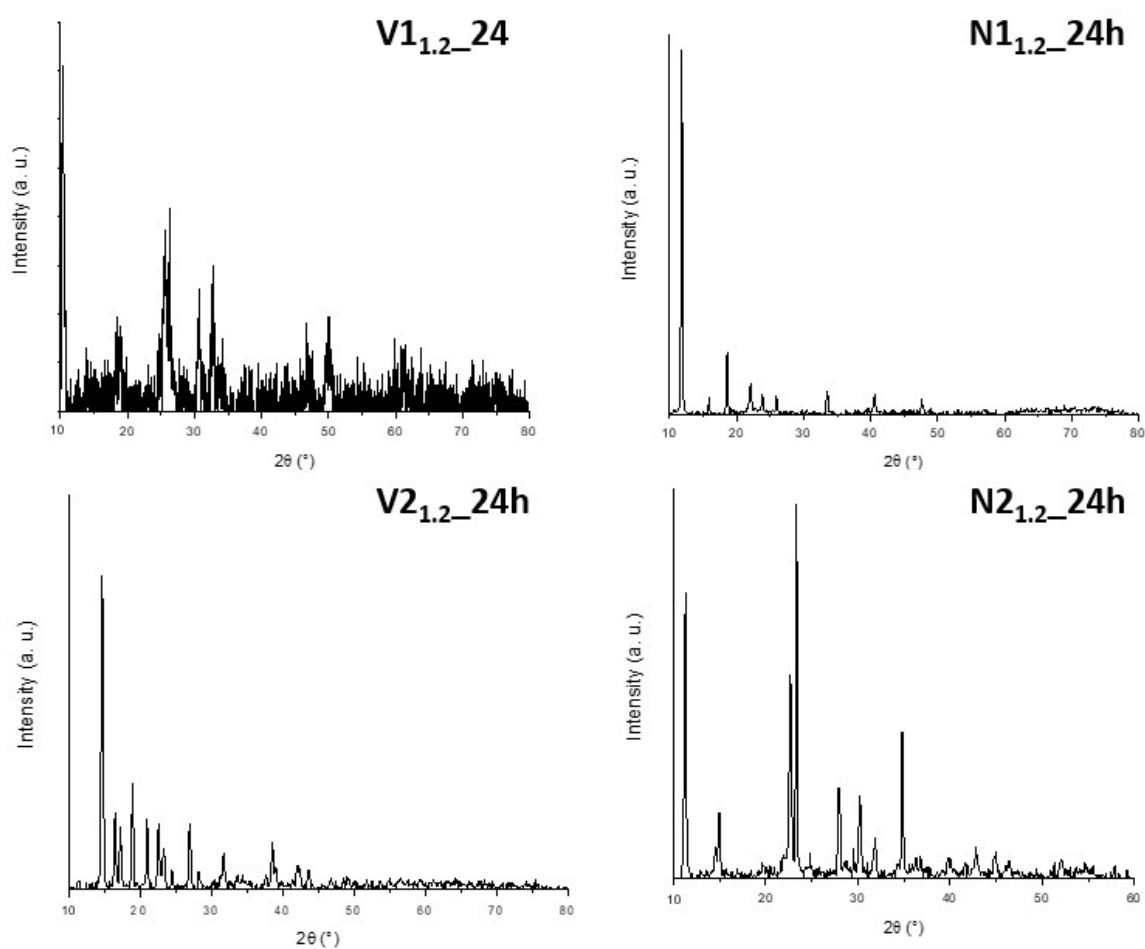

Figure S1: XRD analyses of the following samples: V1<sub>1.2</sub>\_24h, N1<sub>1.2</sub>\_24h, V2<sub>1.2</sub>\_24h, N2<sub>1.2</sub>\_24h.

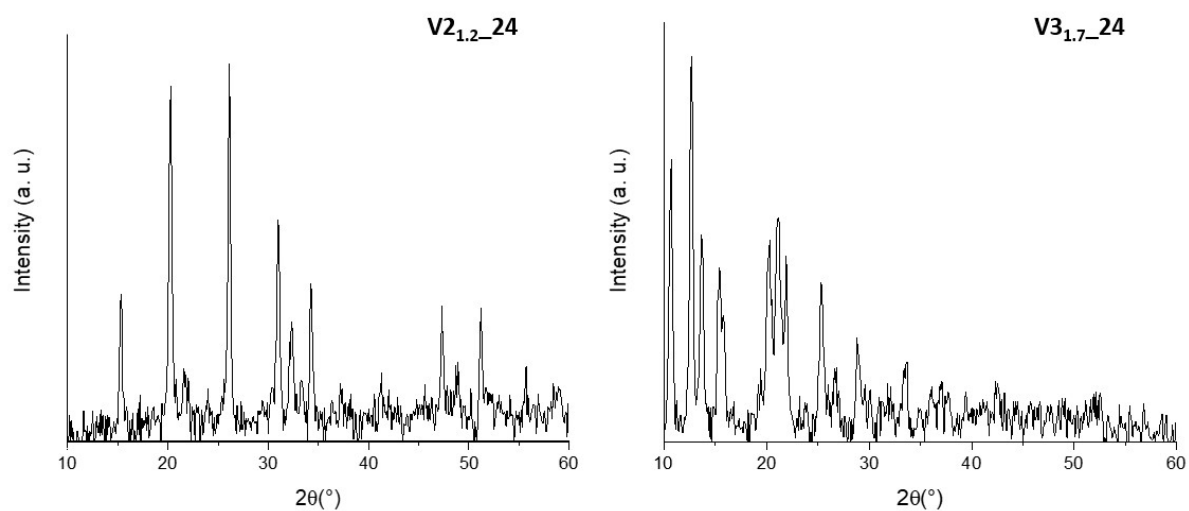

Figure S2: XRD analyses of  $V2_{1.2\_24h}$  (on the left) and  $V3_{1.7\_24h}$  (on the right) with two different vanadium precursor/reducing agent molar ratios, e.g. 1:1.2 and 1:1.7 respectively, without showing any improvement in the formation of the pure crystalline phase  $VO_2(B)$ .

### Stability test in alkaline pH

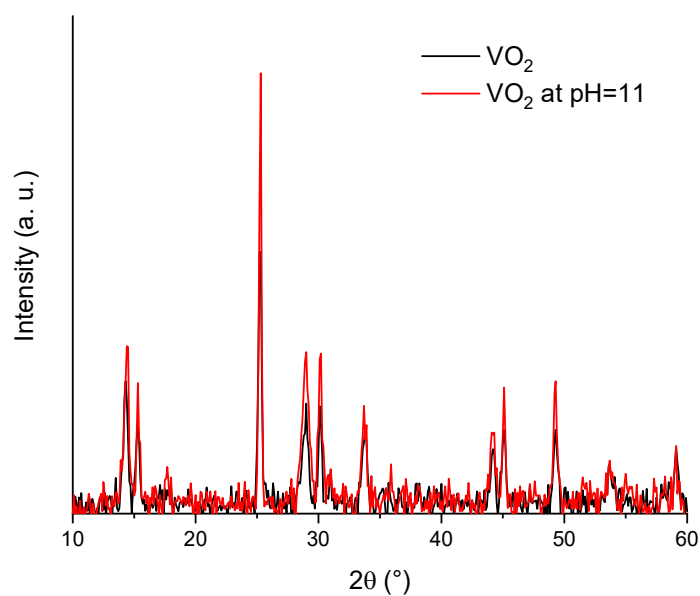

Figure S3: XRD analyses before (black line) and after (red line) the stability test of vanadium dioxide, by its suspension in an alkaline solution of  $Ca(OH)_2$  at pH = 11 for 24 hours.

## SEM measurements

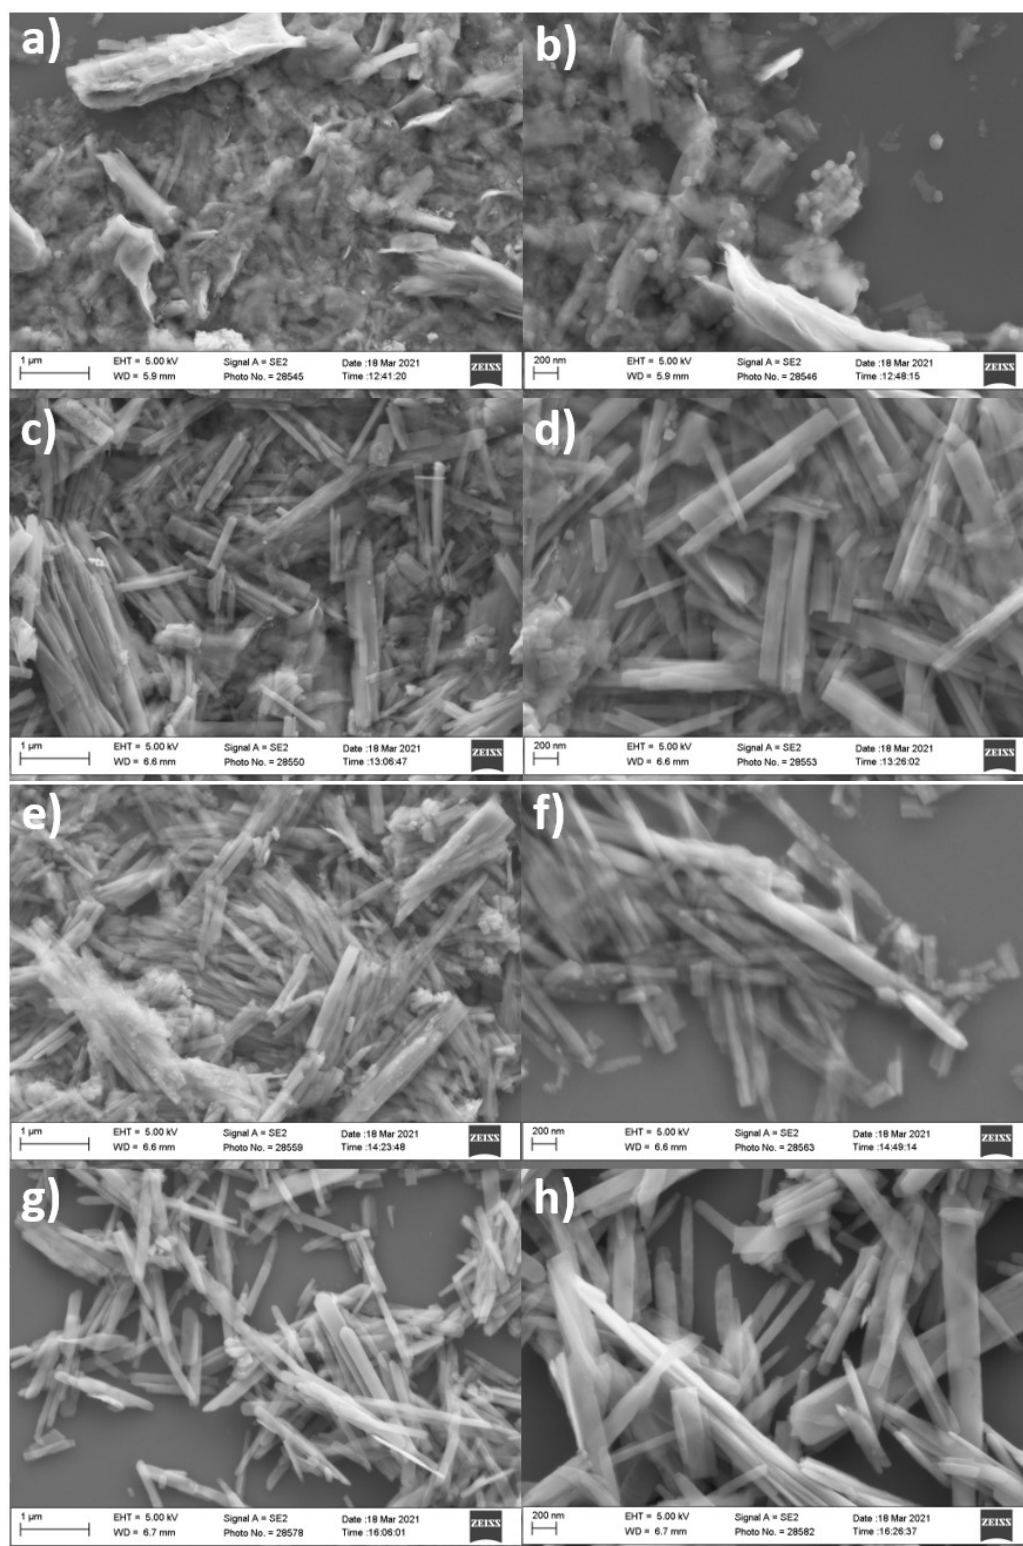

Figure S4: SEM images of the synthesized samples after a reaction time of 6 hours, a) and b), 8 hours, c) and d), 12 hours, e) and f), and 24 hours, g) and h).
